# Supplementary material for: Reversible transitions between noradrenergic and mesenchymal tumor identities define cell plasticity in neuroblastoma
Source: PubMed Central journal article supplement (PMC10160107; doi:10.1038/s41467-023-38239-5), 2023-05-04
Supplement: 41467_2023_38239_MOESM1_ESM.pdf [file 41467_2023_38239_MOESM1_ESM.pdf]

## SUPPLEMENTARY INFORMATION

### **Reversible transitions between noradrenergic and mesenchymal tumor identities define cell plasticity in neuroblastoma**

**Authors:** Cécile Thirant<sup>1,2</sup>, Agathe Peltier<sup>1,2</sup>, Simon Durand<sup>1,2#</sup>, Amira Kramdi<sup>1,2#</sup>, Caroline Louis-Brennetot<sup>1,2#</sup>, Cécile Pierre-Eugène<sup>1,2#</sup>, Margot Gautier<sup>1,2</sup>, Ana Costa<sup>1,2</sup>, Amandine Grelier<sup>1,2</sup>, Sakina Zaïdi<sup>1,2</sup>, Nadège Gruel<sup>1,3</sup>, Irène Jimenez<sup>2,3,4</sup>, Eve Lapouble<sup>5</sup>, Gaëlle Pierron<sup>5</sup>, Déborah Sitbon<sup>5</sup>, Hervé J. Brisse<sup>6</sup>, Arnaud Gauthier<sup>7</sup>, Paul Fréneaux<sup>7</sup>, Sandrine Grossetête<sup>1,2</sup>, Laura G. Baudrin<sup>8</sup>, Virginie Raynal<sup>1,8</sup>, Sylvain Baulande<sup>8</sup>, Angela Bellini<sup>2,3,4</sup>, Jaydutt Bhalshankar<sup>2,3,4</sup>, Angel M. Carcaboso<sup>9</sup>, Birgit Geoerger<sup>10</sup>, Hermann Rohrer<sup>11</sup>, Didier Surdez<sup>1,2</sup>, Valentina Boeva<sup>12,13,14</sup>, Gudrun Schleiermacher<sup>2,3,4</sup>, Olivier Delattre<sup>1,2</sup>, Isabelle Janoueix-Lerosey<sup>1,2\*</sup>

- **Supplementary Figures 1 to 10**

- **Supplementary Tables 1 to 4**

Supplementary Fig. 1

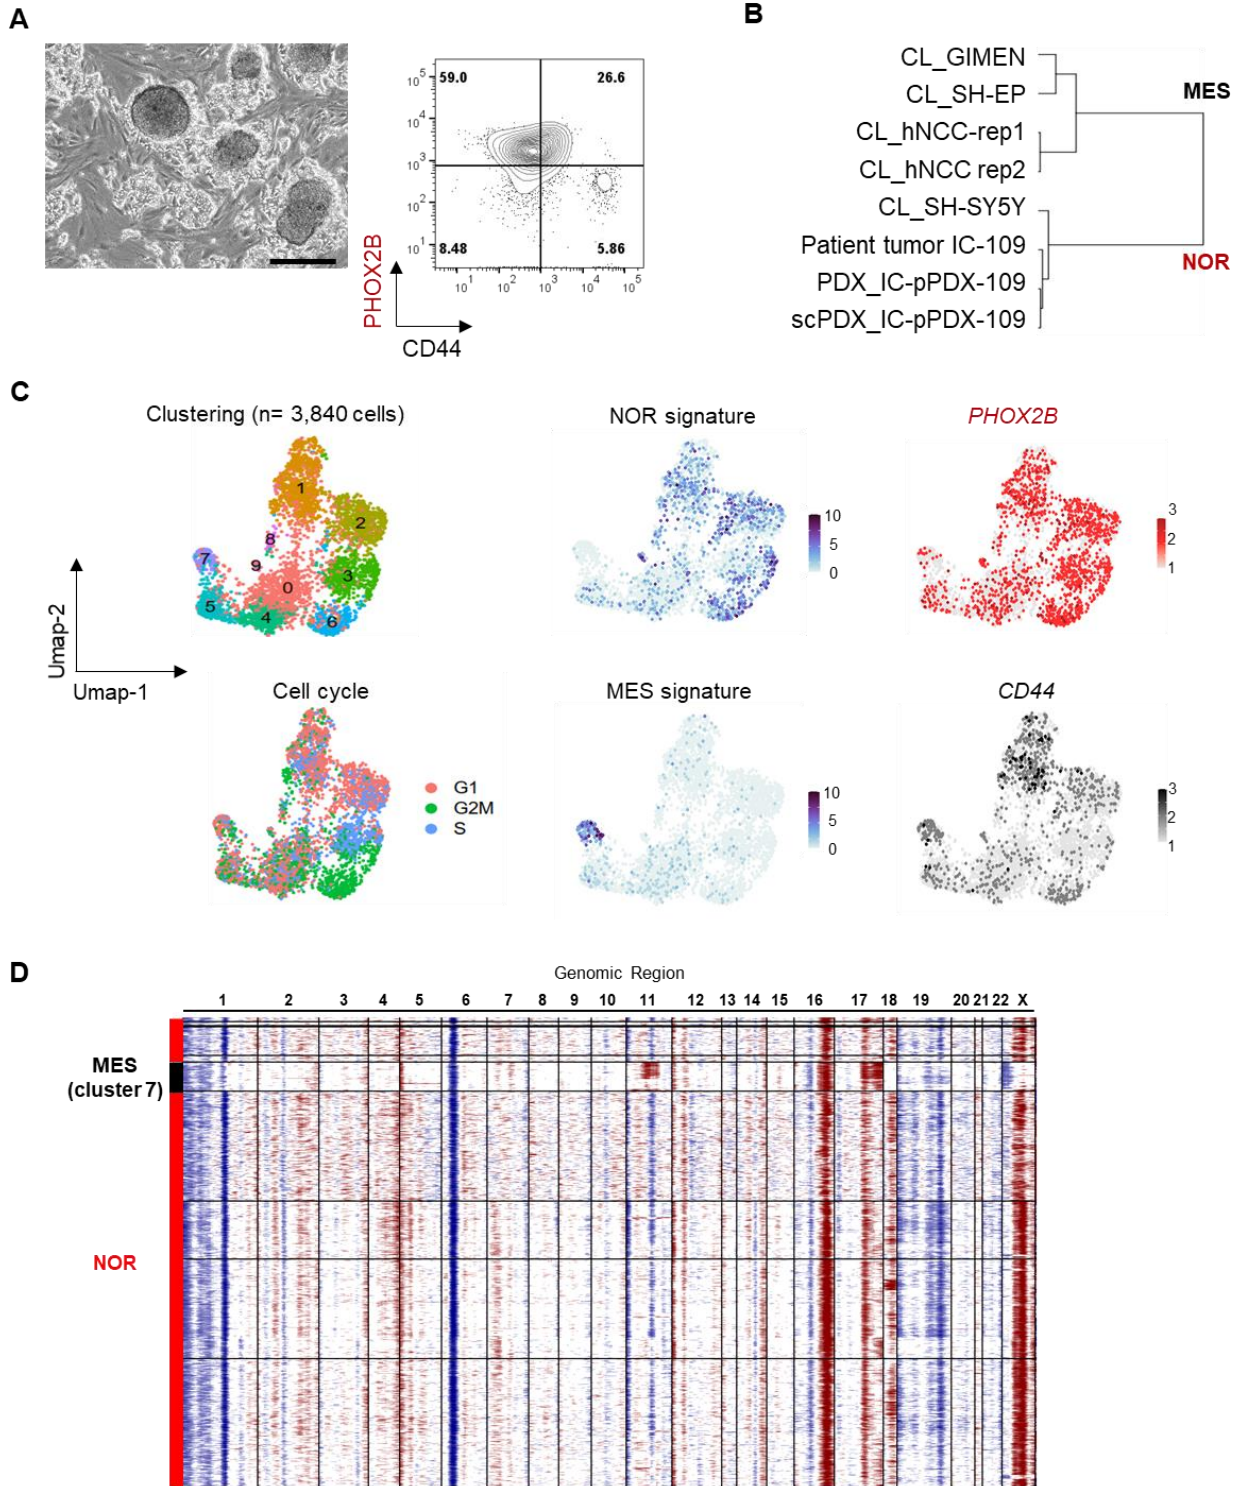

Supplementary Fig. 1: The IC-pPDX-109 model produces noradrenergic and mesenchymal tumor cells *in vitro* giving rise to the heterogeneous IC-PDXC-109 cell line. NOR = noradrenergic, MES = mesenchymal.

**(A)** Left: contrast phase microscopy photograph of the IC-pPDXC-109 cell line (scale bar = 50  $\mu$ m, representative of 3 independent experiments). Right: FACS analysis using human PHOX2B and CD44 marker expression gated on live cells after doublet exclusion on the IC-pPDXC-109 cell line, representative of 3 independent experiments. **(B)** Unsupervised hierarchical clustering of bulk RNAseq data from cell lines (CL), PDX, single-cell data and original patient tumor, using the noradrenergic and mesenchymal transcription factor signatures<sup>17,18</sup> defining two branches. Source data are provided as a Source Data file. **(C)** Single-cell transcriptomic analyses of the IC-pPDXC-109 cell line by Seurat showing clustering at resolution 0.8 and cell cycle phases. Two main cell identities are highlighted by noradrenergic and mesenchymal transcription factor signatures<sup>17,18</sup> and *PHOX2B* and *CD44* expression, respectively. Each cell identity includes cycling cells. **(D)** Inferred genomic profile of the IC-pPDXC-109 cell line obtained with InferCNV on single-cell RNAseq data.

# Supplementary Fig. 2

**A**

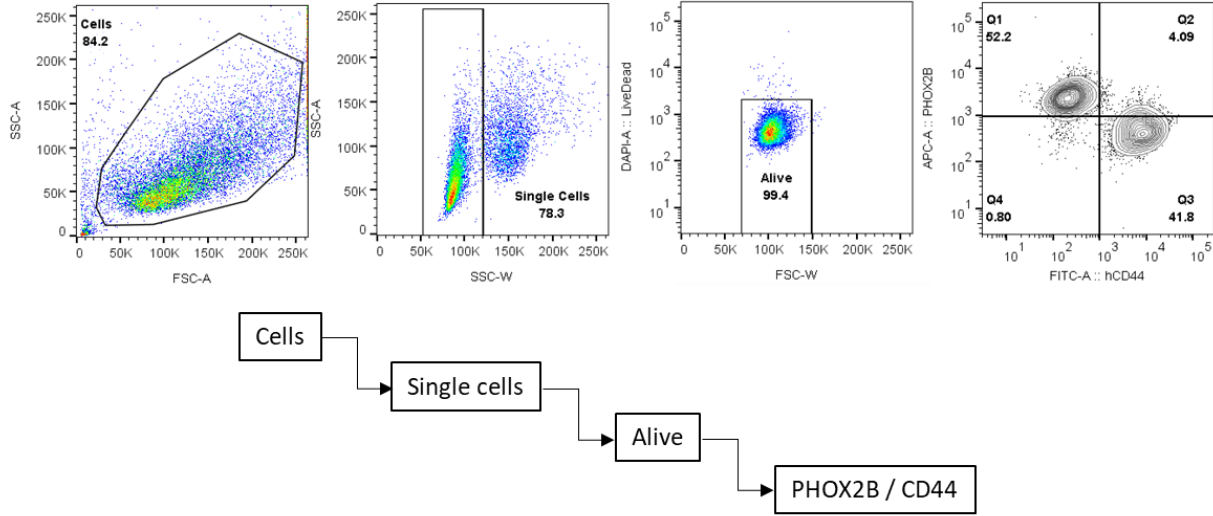

**B**

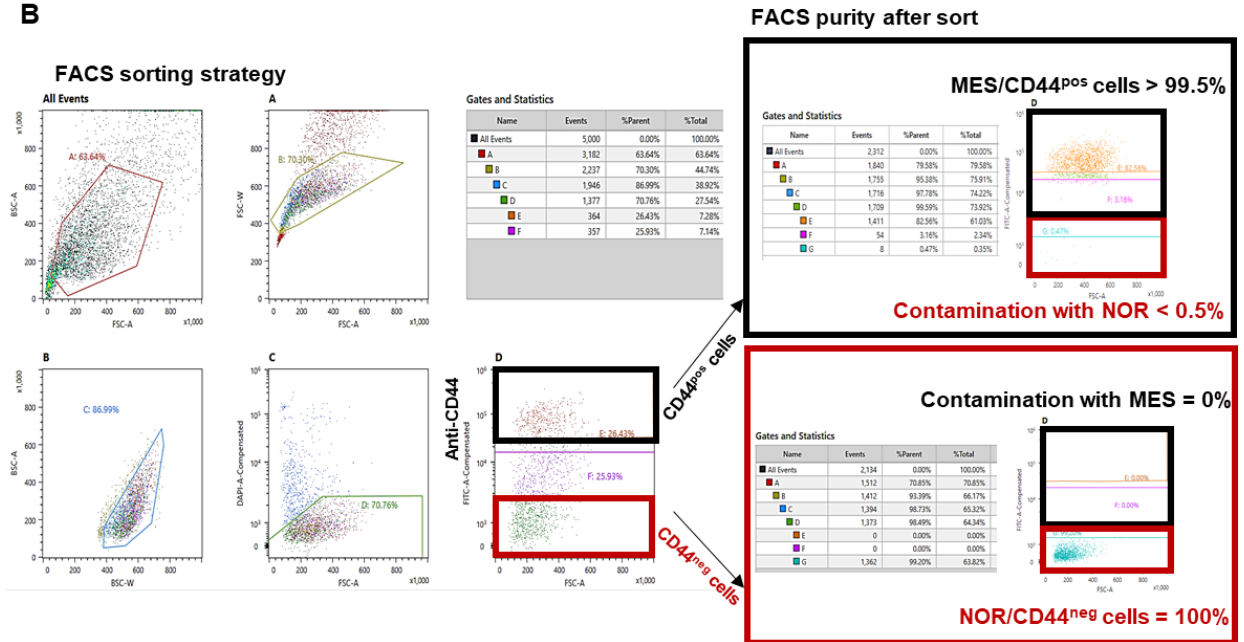

Supplementary Fig. 2

C

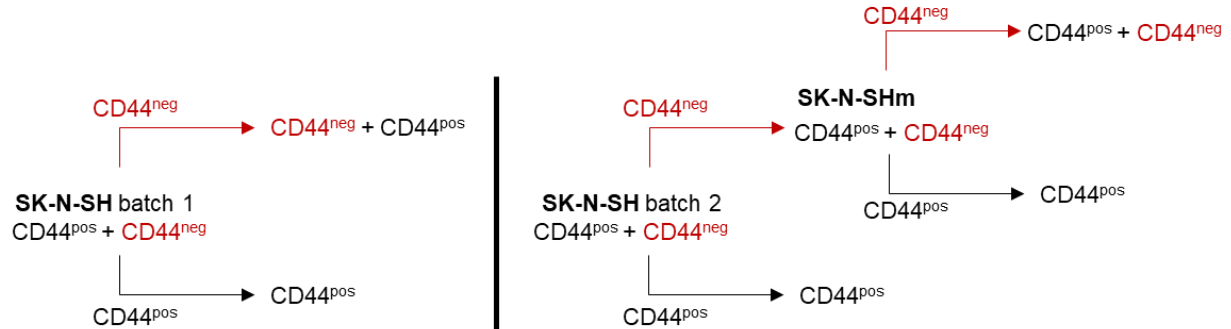

D

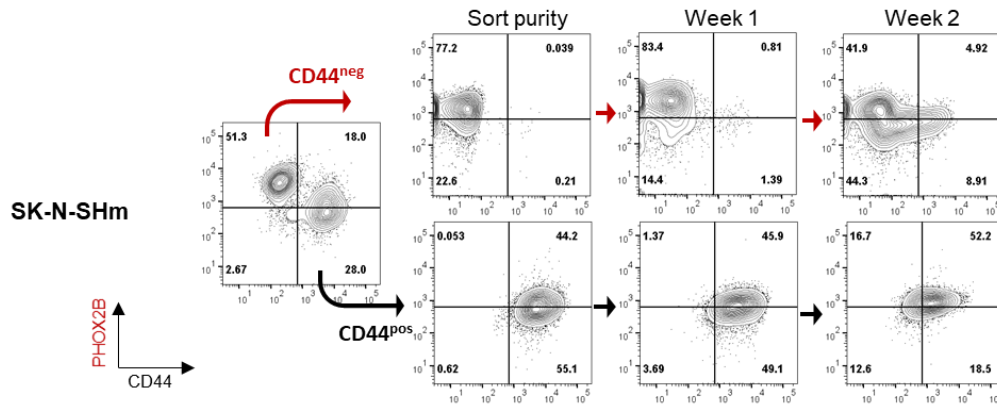

Supplementary Fig. 2: CD44 FACS sorting to study noradrenergic-mesenchymal plasticity in cellular models.

NOR = noradrenergic, MES = mesenchymal. (A) Example of the FACS gating strategy assessed to follow PHOX2B and CD44 expression gated on live cells after doublet exclusion. (B) Example of the FACS gating strategy and purity for CD44 cell sorts. Noradrenergic/CD44<sup>neg</sup> cells were always 100% pure whereas mesenchymal /CD44<sup>pos</sup> cells contain <0.5% of CD44<sup>neg</sup> cells. (C) Schematic representation of reconstitution experiments done with the SK-N-SH model using several batches and CD44 cell sorts by FACS. (D) SK-N-SHm (from batch 2) CD44<sup>neg</sup> and CD44<sup>pos</sup> FACS-sorted cells are cultured and followed by FACS analysis using PHOX2B and CD44 marker expression gated on live cells after doublet exclusion for 2 weeks. Only CD44<sup>neg</sup> cells are able to reconstitute a heterogeneous population of both noradrenergic/CD44<sup>neg</sup> and mesenchymal /CD44<sup>pos</sup> cells.

**Supplementary Fig. 3**

**A**

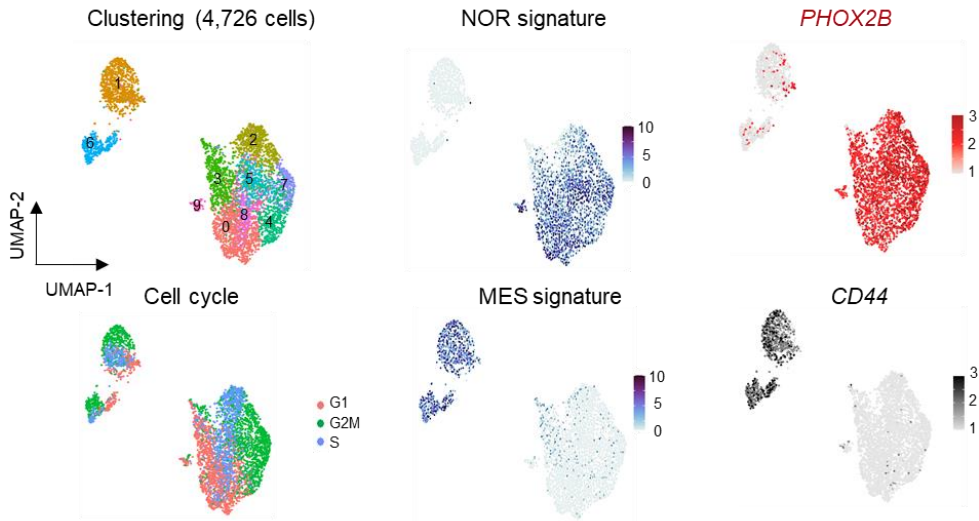

**B**

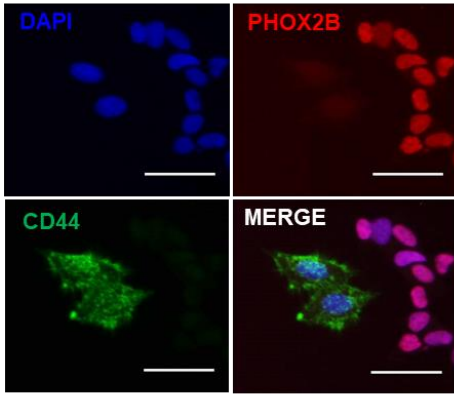

**C**

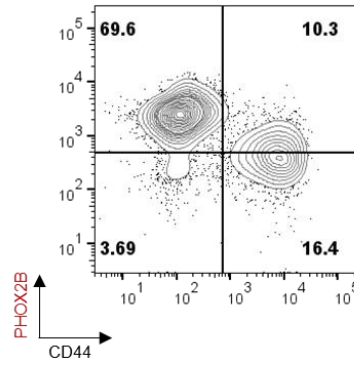

**D**

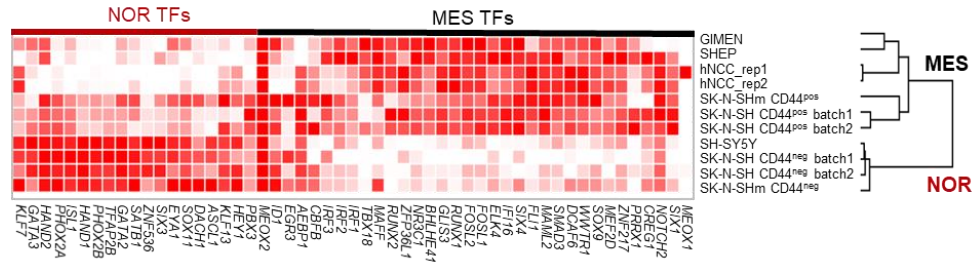

**E**

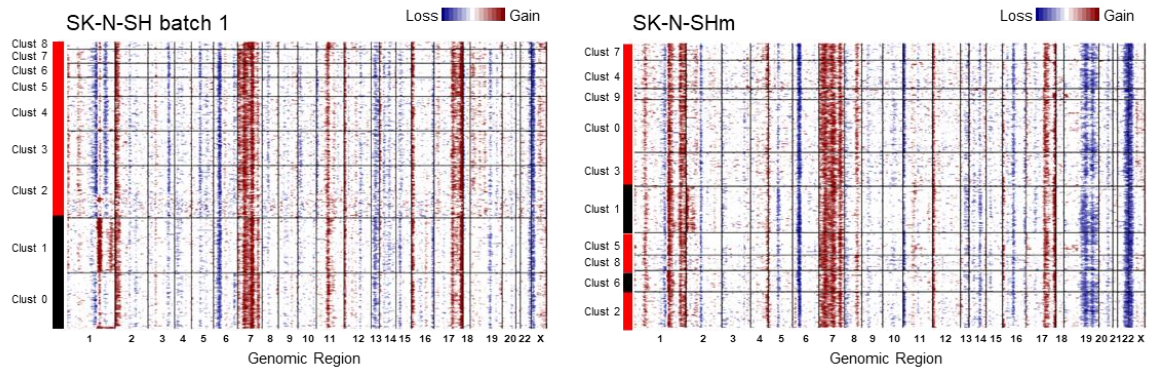

**Supplementary Fig. 3: The SK-N-SHm cell line is a mixed cell line obtained from SK-N-SH CD44<sup>neg</sup> cells.**

NOR = noradrenergic, MES = mesenchymal. **(A)** Single-cell RNA-seq analysis by Seurat of the SK-N-SHm cell line. The umap plot shows the clustering at resolution 0.8 and the cell cycle phases. Two main cell identities are highlighted by noradrenergic and mesenchymal transcription factor signatures<sup>17,18</sup>, *PHOX2B* and *CD44* expression, respectively. Each cell identity includes cycling cells. **(B)** Immunofluorescence analyses of the SK-N-SHm cell line with the *PHOX2B* and *CD44* markers (scale bar = 50  $\mu$ m, representative of 3 independent experiments). **(C)** FACS analysis using human *PHOX2B* and *CD44* marker expression gated on live cells after doublet exclusion on the SK-N-SHm cell line, representative of 3 independent experiments. **(D)** Heatmap showing the expression of noradrenergic and mesenchymal transcription factors (TFs)<sup>17,18</sup> in *CD44*<sup>pos</sup> and *CD44*<sup>neg</sup> cells of two batches of the SK-N-SH cell lines. Source data are provided as a Source Data file. **(E)** Genetic alterations were predicted from single-cell RNAseq data using the InferCNV tool, illustrating some genetic variability between different batches of SK-N-SH cell line.

### Supplementary Fig. 4

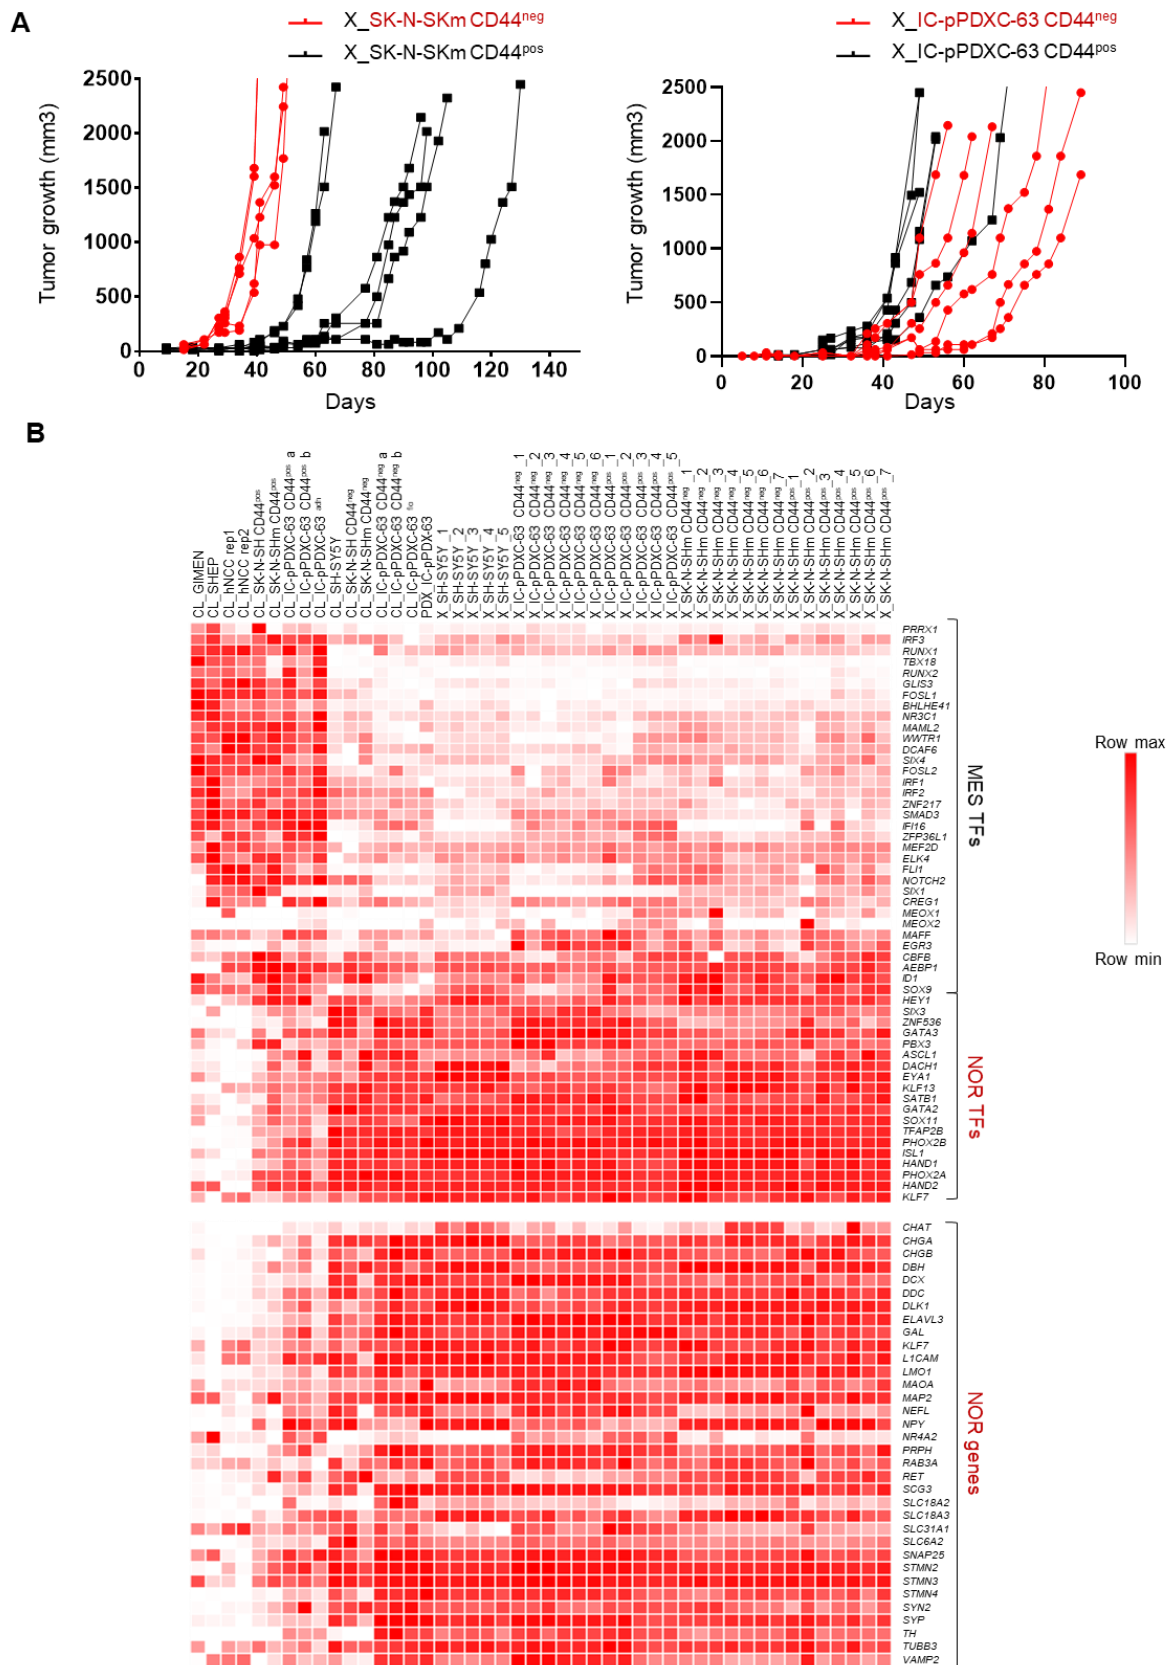



**Supplementary Fig. 4: Mesenchymal tumor cells form noradrenergic tumors *in vivo*.**

NOR = noradrenergic, MES = mesenchymal. Source data are provided as a Source Data file. **(A)** Individual tumor growth curves of SK-N-SHm CD44<sup>pos</sup> or CD44<sup>neg</sup> xenografts (n=7) and IC-pPDXC-63 CD44<sup>pos</sup> or CD44<sup>neg</sup> xenografts (n=6). Mice were sacrificed when tumors reached ethical size. P-values obtained with the Log-rank (Mantel-Cox) test. **(B)** Heatmap showing the expression of noradrenergic and mesenchymal transcription factors (TFs)<sup>17,18</sup>, and noradrenergic genes on the bulk RNAseq data comparing transcriptome data of cell lines (CL\_), PDX and xenografts (X\_) including those obtained from CD44<sup>pos</sup> and CD44<sup>neg</sup> sorted cells.

Supplementary Fig. 5

A

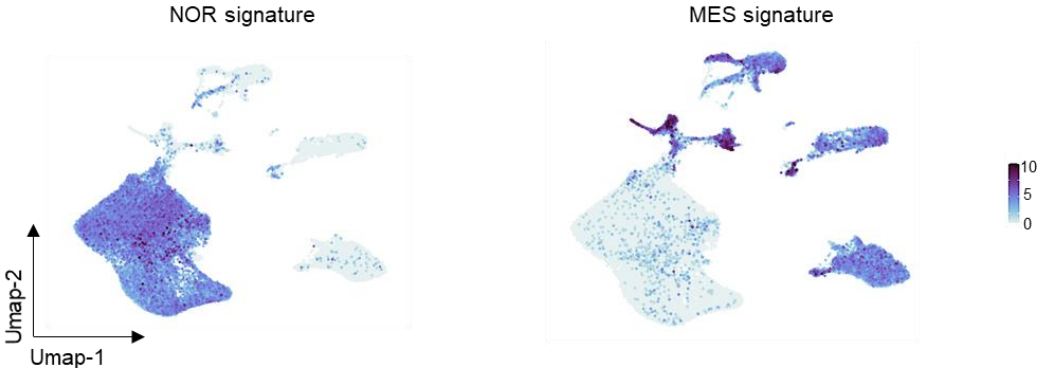

B

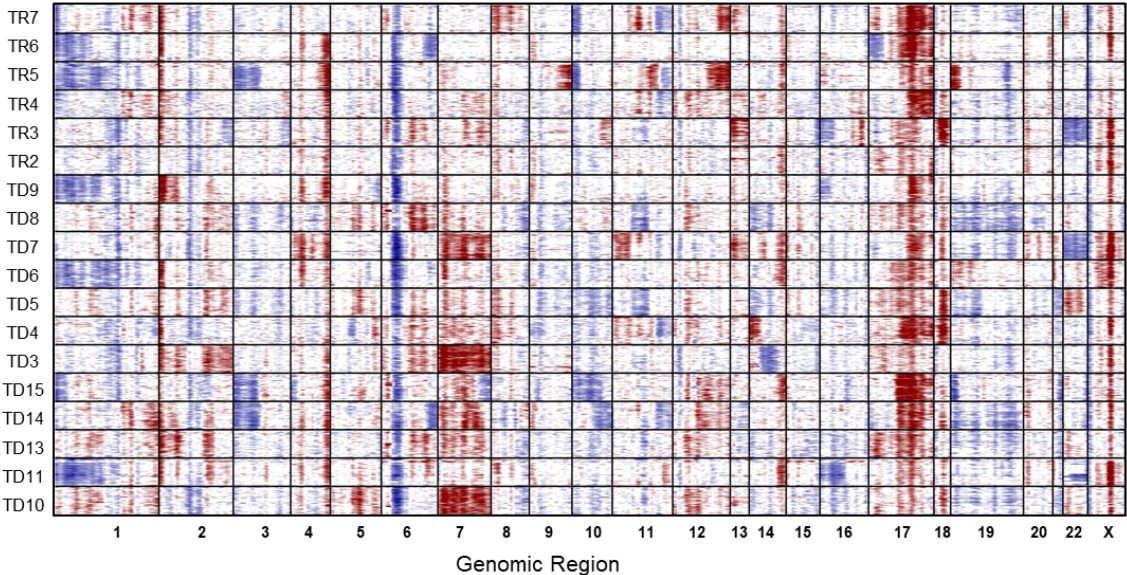

C

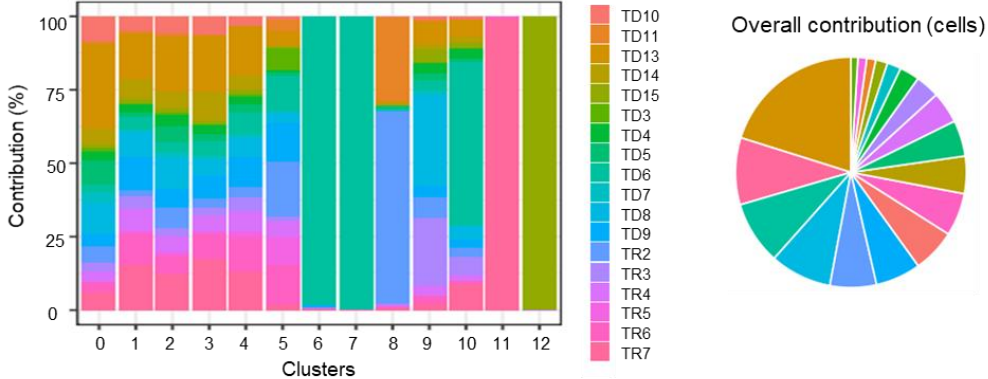

### Supplementary Fig. 5

D

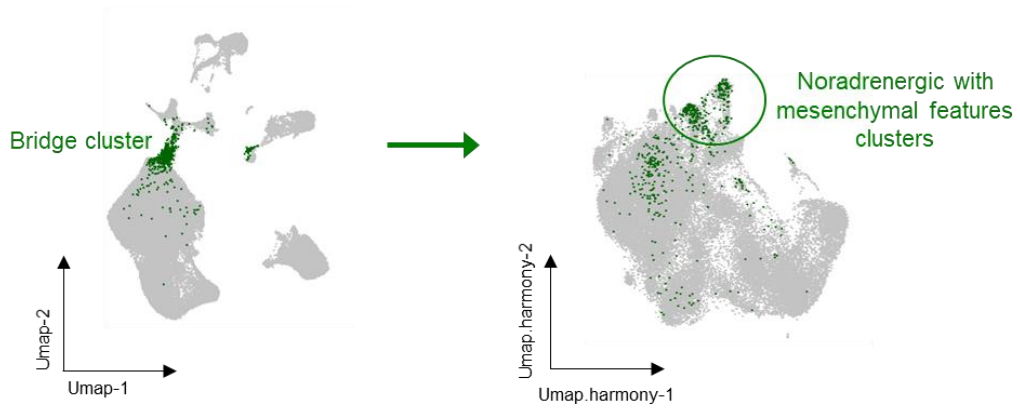

E

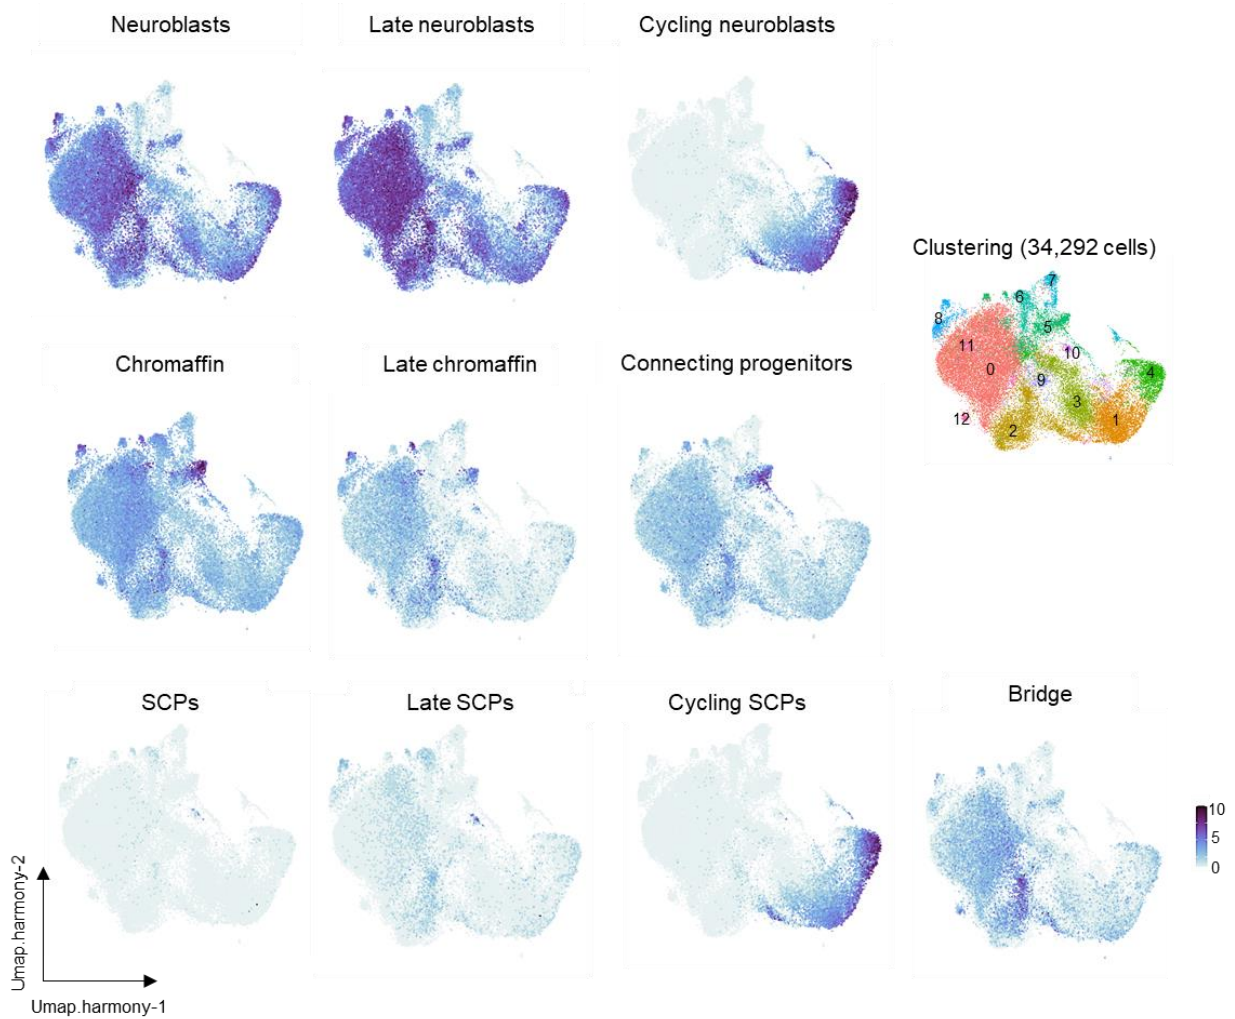

**Supplementary Fig. 5: Detailed analyses of single-cell RNAseq of the 18 biopsies of neuroblastoma.**

NOR = noradrenergic, MES = mesenchymal. **(A)** Umap visualization of the noradrenergic and mesenchymal transcription factor signatures<sup>17,18</sup> plotted on the Seurat integration of 18 biopsies (n = 54,403 cells). **(B)** InferCNV analysis of 300 randomly-selected cells with high coverage (>1,000 UMI) from each sample. **(C)** Contribution of each case to clusters of the harmony integration of noradrenergic tumor cells only (n = 34,292 cells). The histogram highlights the contribution of the different samples to each cluster in percentage. The pie chart depicts the contribution of each sample to the total number of cells. Source data are provided as a Source Data file. **(D)** Highlight of the bridge cluster from the Seurat integration (n = 663 cells, left panel) into the Harmony integration of selected tumor cells (n= 561 cells, right panel). **(E)** Plots of normal adrenal developmental signatures<sup>13</sup> in the integration of noradrenergic tumor cells from the 18 biopsies.

**Supplementary Fig. 6**

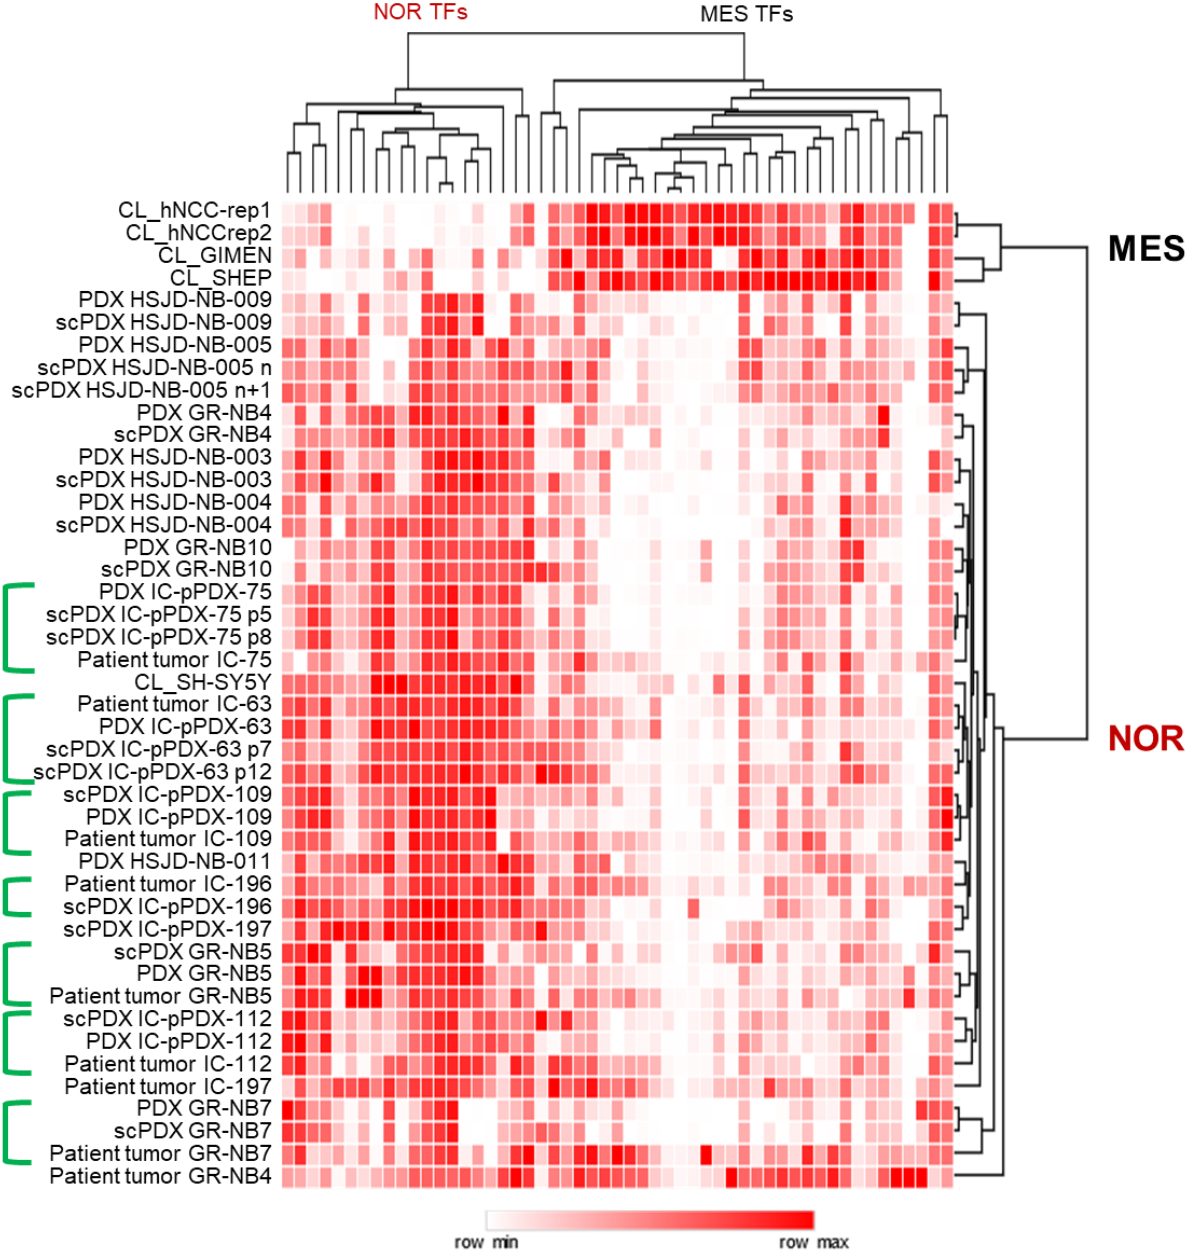

**Supplementary Fig. 6: Relevance of PDXs as models of neuroblastoma pathology**

NOR = noradrenergic, MES = mesenchymal. Unsupervised hierarchical clustering of genes and samples using bulk RNAseq obtained when available from the initial patient tumor biopsy (Patient tumor), its derived PDX model (PDX), and the preparation of cells used for single-cell RNAseq (scPDX) and some cell lines as references (CL), using expression of transcription factors (TFs) of the noradrenergic and mesenchymal identities <sup>17,18</sup>. Green brackets highlight a perfect clustering of the various samples of a specific patient. Source data are provided as a Source Data file.

Supplementary Fig. 7

A

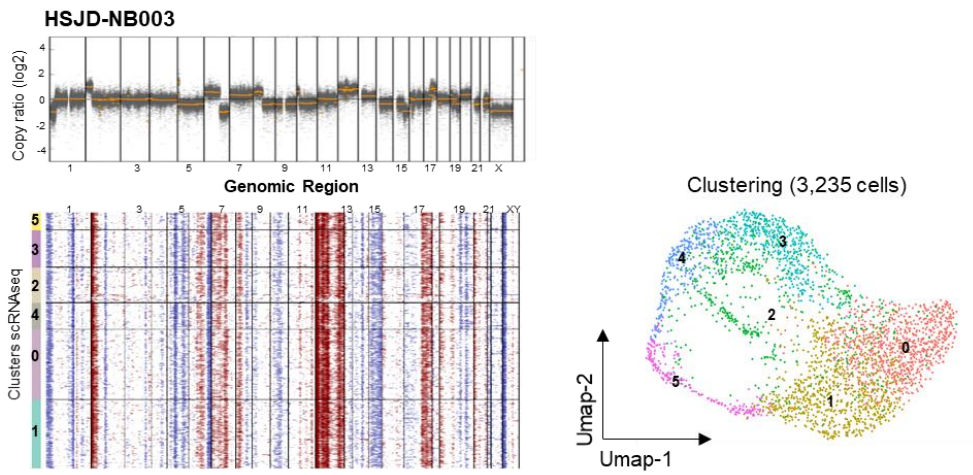

B

**Integration 15 PDXs** (58,120 human tumor cells)

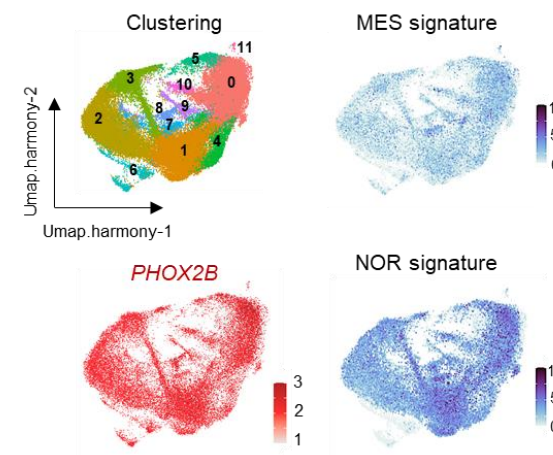

C

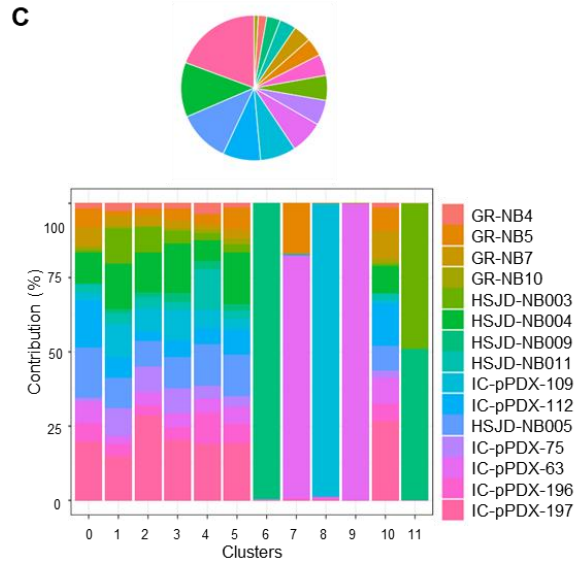

D

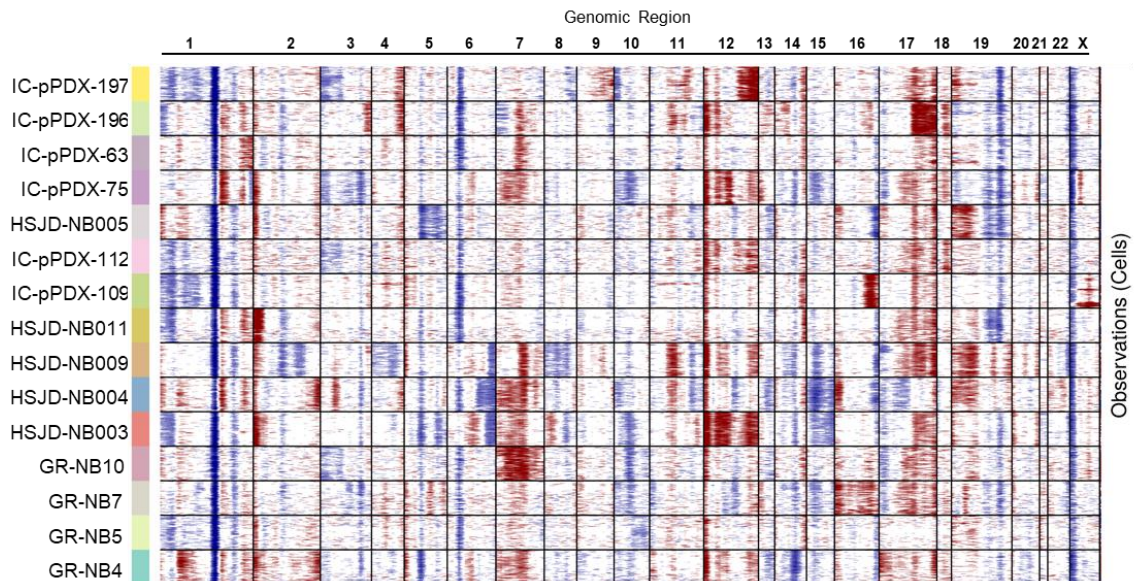

**Supplementary Fig. 7: Detailed analyses of single-cell RNAseq of 15 neuroblastoma PDX models.**

NOR = noradrenergic, MES = mesenchymal. **(A)** Top: Copy number profile inferred from WES data of HSJD-NB-003 PDX model. Bottom: InferCNV and Umap profiles obtained from scRNAseq data of HSJD-NB-003. **(B)** Umap of the 58,120 human tumor cells from the 15 PDX models obtained after the integration of scRNAseq by Harmony (clustering at resolution 0.3). The noradrenergic and the mesenchymal transcription factor signatures<sup>17,18</sup> have been plotted on the integration, as well as *PHOX2B* expression. **(C)** The pie chart depicts the contribution of each sample in the integration (total number of cells) and the histogram highlights the contribution of the different samples to each cluster in percentage. Source data are provided as a Source Data file. **(D)** Overview of the genomic alterations present in each case with the InferCNV profiles on the 15 PDX models, using 500 randomly-selected cells with high coverage (>1,000 UMI) from each sample.

Supplementary Fig. 8

A

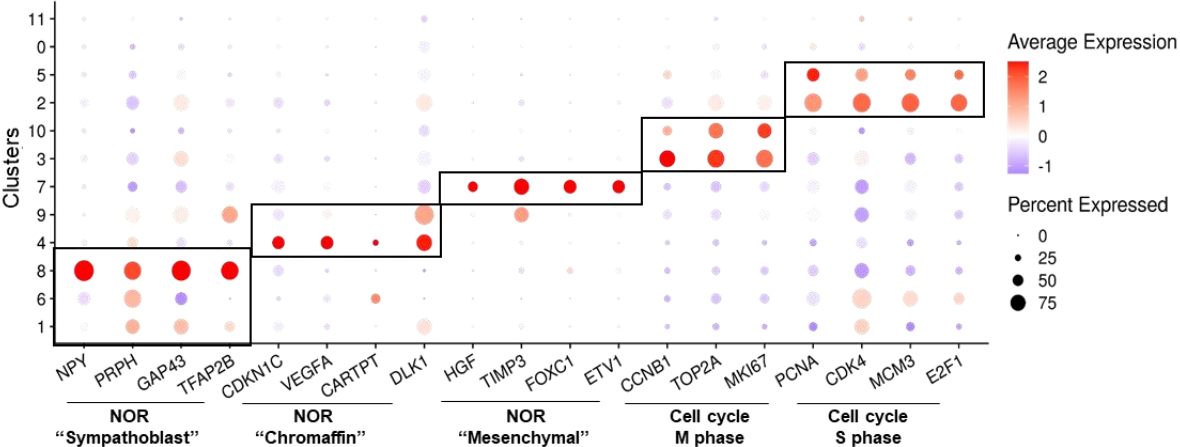

B

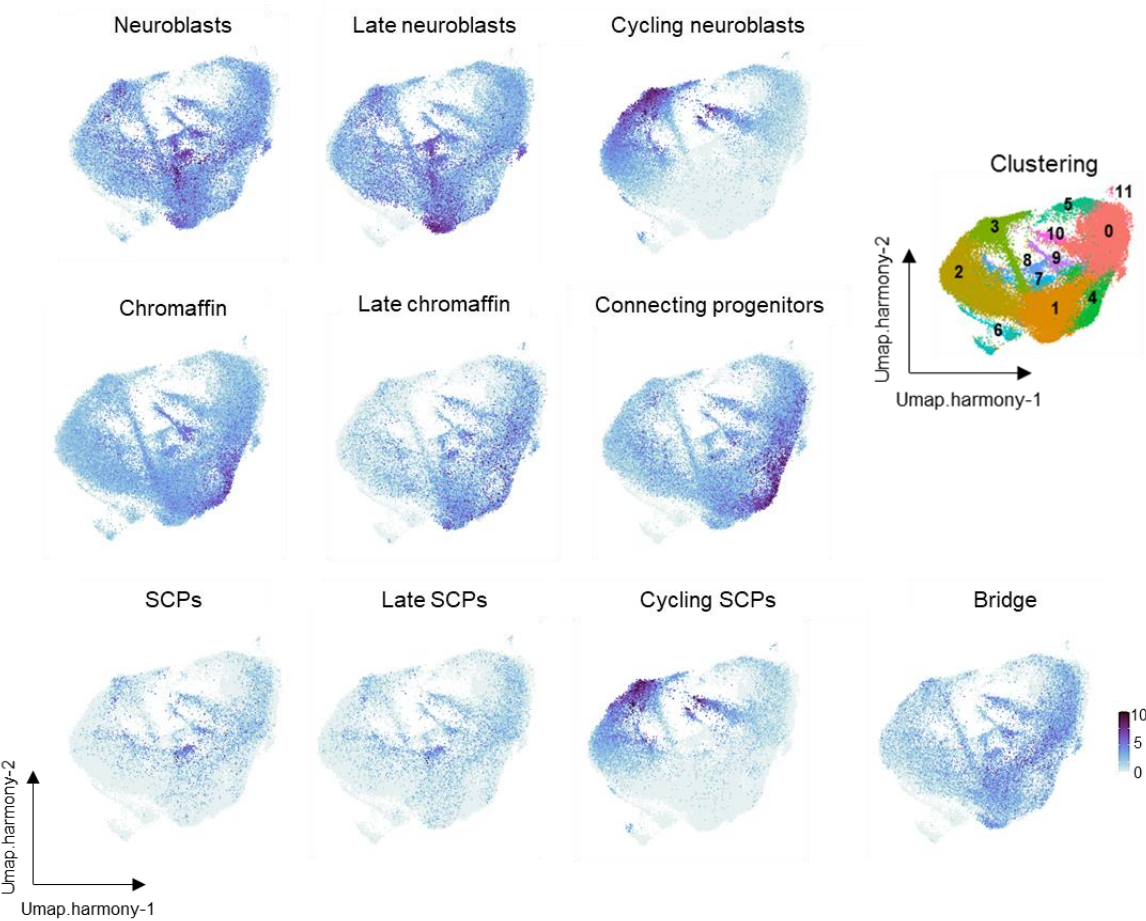



**Supplementary Fig. 8**

**C**

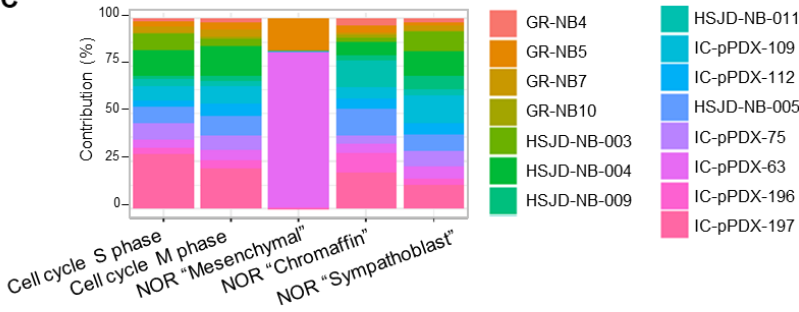

**D**

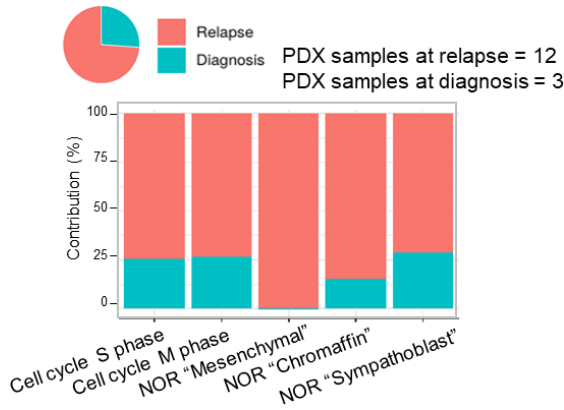

**E**

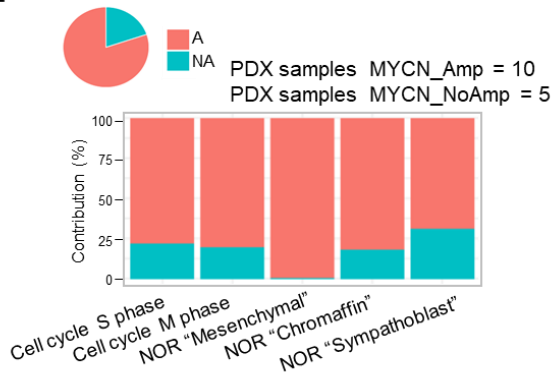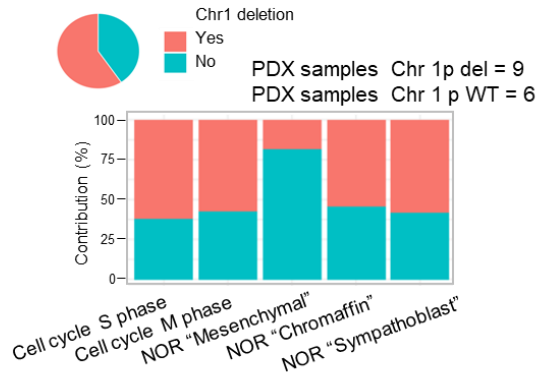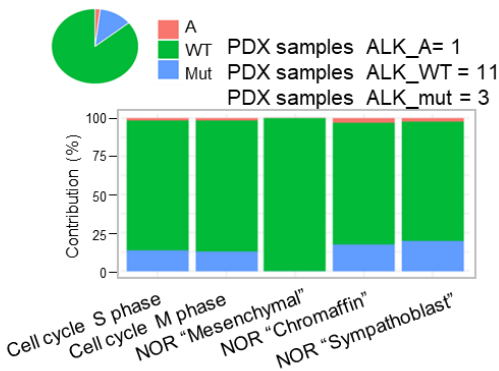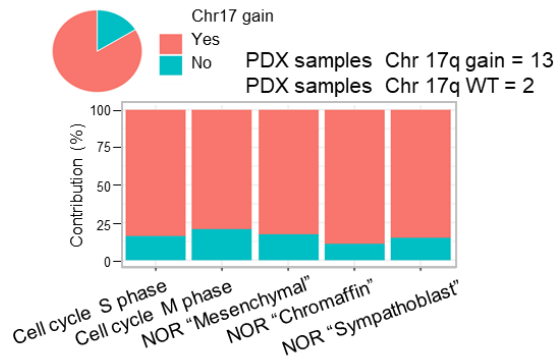

**Supplementary Fig. 8: Intra-tumor heterogeneity assessed by scRNAseq in the neuroblastoma PDX cohort.**

NOR = noradrenergic, SCPs = Schwann cell progenitors. Source data are provided as a Source Data file. **(A)** Dot plot graph illustrating cluster-specific gene expression in the integration of single-cell RNAseq from 15 neuroblastoma PDX models. Three main noradrenergic tumor cell identities could be defined. **(B)** Umap plots of normal adrenal developmental signatures<sup>13</sup> in the integration of 15 neuroblastoma PDX models. **(C)** Sample contribution to each cell identity. **(D)** Contribution of diagnosis versus relapse cases in the overall integration (pie chart) of the 15 neuroblastoma PDX models and in each cell identity. **(E)** Contribution of some classical neuroblastoma genomic alterations in the overall integration (pie chart) of the 15 neuroblastoma PDX models and in each cell identity.

**Supplementary Fig. 9**

**A**

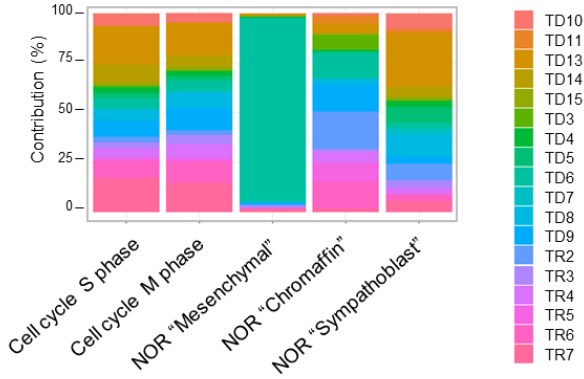

**B**

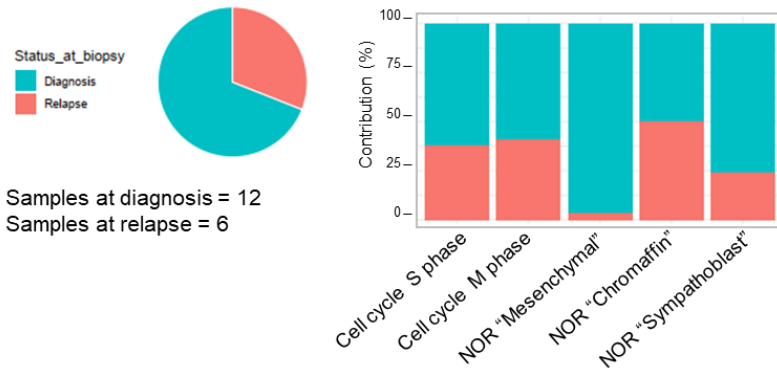

**C**

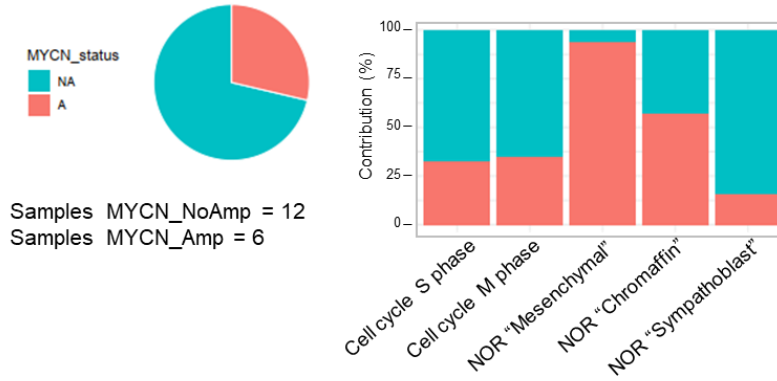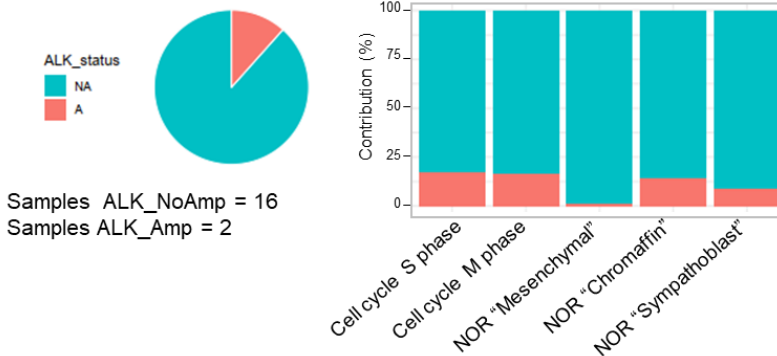

**Supplementary Fig. 9: Intra-tumor heterogeneity assessed by scRNAseq in the neuroblastoma patient biopsies cohort.**

NOR = noradrenergic. Source data are provided as a Source Data file. **(A)** Sample contribution to each cell identity. **(B)** Contribution of diagnosis versus relapse cases in the overall integration (pie chart) of the 18 neuroblastoma biopsies and in each cell identity. **(C)** Contribution of some classical neuroblastoma genomic alterations in the overall integration (pie chart) of the 18 neuroblastoma biopsies and in each cell identity.

## Supplementary Fig. 10

A

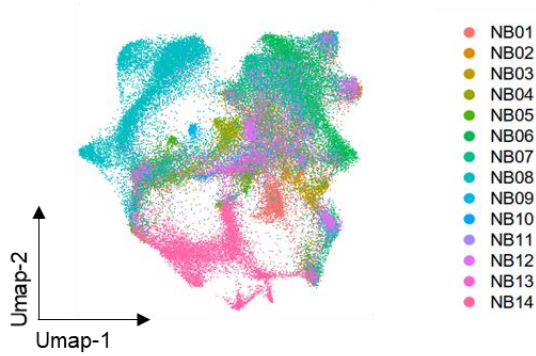

B

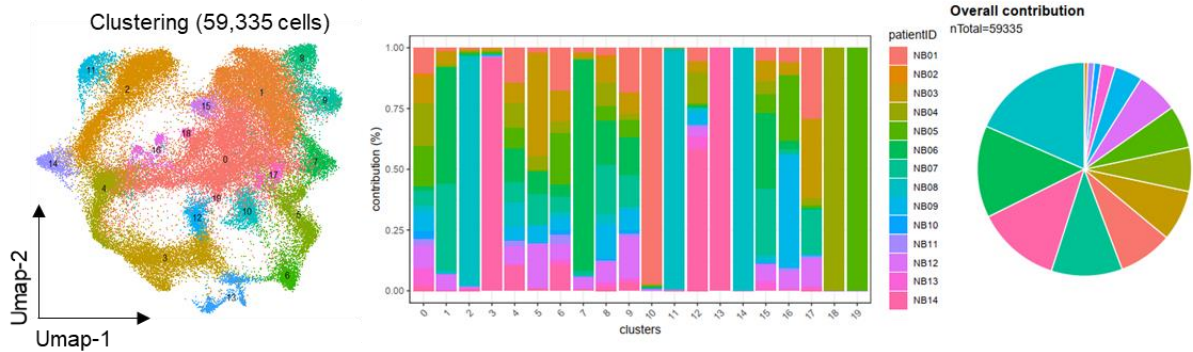

C

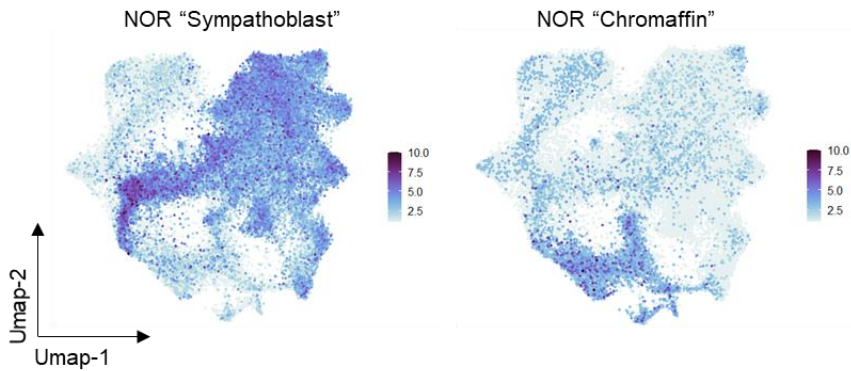

### Supplementary Fig. 10: Intra-tumor heterogeneity in the snRNAseq dataset from Janksy *et al.*<sup>13</sup>

NOR = noradrenergic. (A) Seurat integration and contribution of noradrenergic tumor cells from 14 neuroblastoma cases ( $n = 59,335$  cells). (B) Clustering and contribution of each case to clusters. Source data are provided as a Source Data file. (C) Plots of signatures identifying noradrenergic tumor cells with either sympathoblast or chromaffin features.

**Supplementary Table 1: Characteristics of the 18 neuroblastoma biopsies studied by scRNA-seq.**

| Name  | Analyzed at diagnosis or relapse | Primary tumor at diagnosis       | INSS Stage | Age at diagnosis | Sex | MYCN status (A or NA) | ALK status (A or NA) | Genomic profile (NCA or SCA) | Site of biopsy for scRNA-seq | Histology                                       |
|-------|----------------------------------|----------------------------------|------------|------------------|-----|-----------------------|----------------------|------------------------------|------------------------------|-------------------------------------------------|
| TD3   | Diagnosis                        | adrenal (right)                  | 4          | > 5y             | M   | A                     | NA                   | NCA                          | adrenal (right)              | Neuroblastic tumor. MKI not determined.         |
| TD4   | Diagnosis                        | adrenal (left)                   | 4          | > 5y             | M   | NA                    | NA                   | SCA                          | adrenal (left)               | Stroma-poor, poorly differentiated              |
| TD5   | Diagnosis                        | mediastinum with retroperitoneal | 4          | [18m - 5y]       | F   | NA                    | NA                   | NCA with atypical SCA        | mediastinum (left)           | Stroma-poor, poorly differentiated              |
| TD6   | Diagnosis                        | retroperitoneal (left)           | 3          | [18m - 5y]       | F   | A                     | NA                   | SCA                          | retroperitoneal (left)       | Stroma-poor, poorly differentiated              |
| TD7   | Diagnosis                        | mediastinal                      | 4          | [18m - 5y]       | M   | NA                    | NA                   | SCA                          | mediastinal                  | Stroma-poor, poorly differentiated              |
| TD8   | Diagnosis                        | mediastinal                      | Localized  | < 18m            | F   | NA                    | NA                   | NCA                          | Thoracic (left)              | Stroma-poor, poorly differentiated              |
| TD9   | Diagnosis                        | adrenal (left)                   | 4          | [18m - 5y]       | M   | A                     | A                    | SCA                          | retroperitoneal              | Stroma-poor, poorly differentiated              |
| TD10  | Diagnosis                        | retroperitoneal (right)          | Localized  | < 18m            | M   | NA                    | NA                   | NCA                          | para-vertebral (right)       | Stroma-poor, poorly differentiated              |
| TD11* | Diagnosis                        | adrenal (right)                  | Localized  | [18m - 5y]       | M   | NA                    | NA                   | SCA                          | adrenal (right)              | Stroma-poor, poorly differentiated              |
| TD13  | Diagnosis                        | retroperitoneal-adrenal-         | 4S         | < 18m            | M   | NA                    | NA                   | SCA                          | retroperitoneal (left)       | Stroma-poor, poorly differentiated              |
| TD14  | Diagnosis                        | abdominal (median)               | 4          | [18m - 5y]       | M   | A                     | A                    | SCA                          | retroperitoneal (left)       | Poorly differentiated neuroblastoma or          |
| TD15  | Diagnosis                        | adrenal (left)                   | 4          | [18m - 5y]       | M   | NA                    | NA                   | SCA                          | retroperitoneal (left)       | Stroma-poor, poorly differentiated              |
| TR2   | Relapse                          | abdominopelvic                   | 4S         | < 18m            | M   | NA                    | NA                   | NCA                          | retroperitoneal              | Neuroblastic tumor exhibiting post-             |
| TR3   | Relapse                          | retroperitoneal, pancreatic      | 4          | > 5y             | M   | NA                    | NA                   | SCA                          | cervical lymphadenopathy     | Stroma-poor, poorly differentiated              |
| TR4   | Relapse                          | pre-renal (right)                | 4          | [18m - 5y]       | F   | NA                    | NA                   | SCA                          | temporal fossa (left)        | Compatible with poorly differentiated           |
| TR5   | Relapse                          | adrenal (right)                  | Localized  | [18m - 5y]       | F   | A                     | NA                   | SCA                          | lung                         | Compatible with a neuroblastoma.                |
| TR6   | Relapse                          | adrenal (right)                  | 4S         | < 18m            | M   | A                     | NA                   | SCA                          | iliac lymph node             | Compatible with a stroma-poor, undifferentiated |
| TR7   | Relapse                          | abdominal                        | 4          | [18m - 5y]       | M   | NA                    | NA                   | SCA                          | retroperitoneal (left)       | Stroma-poor, poorly differentiated              |

m: months, y: years

A: amplified; NA: non amplified.

NCA: Numerical chromosome Aberrations; SCA: Segmental Chromosome Aberrations.

MKI: Mitosis-Karyorrhexis Index

\*: NF1 context

**Supplementary Table 2:** Characteristics of the 15 neuroblastoma PDX models studied by scRNA-seq.

| Name         | Primary tumor at diagnosis | INSS Stage | Age at diagnosis | Sex | Status at biopsy for PDX | Site of biopsy | MYCN status | ALK status | Chr 1p deletion | Chr 17q gain |
|--------------|----------------------------|------------|------------------|-----|--------------------------|----------------|-------------|------------|-----------------|--------------|
| GR-NB4       | Adrenal                    | 4          | [18m - 5y]       | F   | Relapse                  | Primary tumor  | A           | A          | Yes             | WG           |
| GR-NB5       | Adrenal                    | 4          | [18m - 5y]       | M   | Relapse                  | Lymph Node     | A           | WT         | Yes             | No           |
| GR-NB7       | Thoracic-abdominal         | 4          | [18m - 5y]       | M   | Relapse                  | Bone           | A           | WT         | Yes             | Yes          |
| GR-NB10      | Adrenal                    | 4          | > 5y             | M   | Relapse                  | Bone           | NA          | WT         | No              | Yes          |
| IC-pPDX-63   | Adrenal                    | 4          | > 5y             | M   | Relapse                  | Frontal brain  | A           | WT         | No              | Yes          |
| IC-pPDX-75   | Thoracic                   | 4          | > 5y             | F   | Relapse                  | Liver          | NA          | F1174L     | No              | Yes          |
| IC-pPDX-109  | Abdominal                  | 4          | > 5y             | M   | Refractory               | Primary tumor  | A           | WT         | Yes             | Yes          |
| IC-pPDX-112  | Adrenal                    | 4          | [18m - 5y]       | M   | Diagnosis                | Primary tumor  | A           | WT**       | Yes             | Yes          |
| IC-pPDX-196  | Pre-renal                  | 4          | [18m - 5y]       | F   | Relapse                  | Temporal fossa | NA          | WT         | Yes             | Yes          |
| IC-pPDX-197  | Adrenal                    | Localized  | [18m - 5y]       | F   | Relapse                  | Lung           | A           | WT         | Yes             | Yes          |
| HSJD-NB-003  | Paravertebral              | 4          | [18m - 5y]       | F   | Diagnosis                | Liver          | NA          | WT         | Yes             | Yes          |
| HSJD-NB-004* | Renal                      | 4          | [18m - 5y]       | F   | Diagnosis                | Lymph Node     | A           | WT         | No              | No           |
| HSJD-NB-005* | Renal                      | 4          | [18m - 5y]       | F   | Refractory               | Bone Marrow    | A           | WT         | No              | Yes          |
| HSJD-NB-009  | Unknown                    | 4          | [18m - 5y]       | M   | Relapse                  | Bone           | NA          | E1419K     | No              | Yes          |
| HSJD-NB-011  | Retroperitoneal            | 4          | [18m - 5y]       | M   | Relapse                  | Primary tumor  | A           | I1171N     | Yes             | Yes          |

\* These two models have been generated from the same patient.

\*\* Genomic amplification part of intron 3 of ALK gene.

m: months, y: years, A: amplified; NA: not amplified; WG: Whole Chromosome 17 gain

**Supplementary Table 3:** Filtering of human cells with high quality data for the scRNAseq done on the 18 neuroblastoma biopsies.

| Samples | nCells | global ambient mRNA contamination fraction | Quality filters |                     |                |     | Summary after filtering |             |            |               |
|---------|--------|--------------------------------------------|-----------------|---------------------|----------------|-----|-------------------------|-------------|------------|---------------|
|         |        |                                            | nDoublets       | Coverage thresholds | minimum nGenes | %MT | nCells                  | %cells kept | median Cov | median nGenes |
| TR2     | 4614   | 1.00%                                      | 584             | [417, 36140]        | 316            | 20% | 2518                    | 55%         | 6926       | 2857.5        |
| TR3     | 3183   | 1.72%                                      | 111             | [426, 89556]        | 290            | 20% | 2571                    | 81%         | 2733       | 1338          |
| TR4     | 10990  | 0.27%                                      | 206             | [862, 46143]        | 501            | 20% | 2407                    | 22%         | 2398       | 1263          |
| TR5     | 1434   | 0.87%                                      | 50              | [424, 104973]       | 265            | 20% | 1318                    | 92%         | 4410.5     | 1989          |
| TR6     | 3715   | 1.14%                                      | 220             | [394, 123516]       | 217            | 20% | 2519                    | 68%         | 7071       | 2845          |
| TR7     | 5113   | 1.00%                                      | 56              | [406, 85880]        | 258            | 20% | 4312                    | 84%         | 8255.5     | 3225          |
| TD3     | 936    | 0.79%                                      | 91              | [501, 58534]        | 242            | 20% | 768                     | 82%         | 9177       | 3482          |
| TD4     | 1725   | 1.00%                                      | 43              | [453, 27085]        | 283            | 20% | 1357                    | 79%         | 2982       | 1544          |
| TD5     | 2763   | 1.17%                                      | 129             | [456, 88424]        | 301            | 20% | 2258                    | 82%         | 11940      | 3996          |
| TD6     | 3651   | 0.07%                                      | 151             | [461, 51657]        | 345            | 20% | 3274                    | 90%         | 7236.5     | 2946.5        |
| TD7     | 1158   | 0.58%                                      | 0               | [441, 84261]        | 295            | 20% | 1083                    | 94%         | 14357      | 4462          |
| TD8     | 4734   | 0.03%                                      | 15              | [408, 59874]        | 317            | 20% | 3954                    | 84%         | 8006       | 3305.5        |
| TD9     | 4730   | 0.08%                                      | 22              | [365, 81832]        | 229            | 20% | 3284                    | 69%         | 2634.5     | 1496          |
| TD10    | 3793   | 1.00%                                      | 34              | [565, 80782]        | 397            | 20% | 3606                    | 95%         | 9332.5     | 3543.5        |
| TD11    | 1445   | 1.00%                                      | 0               | [460, 130809]       | 276            | 20% | 1305                    | 90%         | 9695       | 3485          |
| TD13    | 10898  | 1.00%                                      | 602             | [403, 52270]        | 330            | 20% | 9853                    | 90%         | 5343       | 2525          |
| TD14    | 3508   | 1.00%                                      | 57              | [420, 61050]        | 276            | 20% | 3234                    | 92%         | 9521       | 3391          |
| TD15    | 5878   | 3%                                         | 132             | [419, 37194]        | 227            | 20% | 4782                    | 81%         | 2302.5     | 1093          |



**Supplementary Table 4:** Filtering of human cells with high quality data for the scRNAseq done on 15 neuroblastoma PDX models.

| Samples           | Retained Human/<br>human-murine<br>doublet<br>cells | Quality filters       |                           |                     |                |     | Summary after filtering |             |            |               |
|-------------------|-----------------------------------------------------|-----------------------|---------------------------|---------------------|----------------|-----|-------------------------|-------------|------------|---------------|
|                   |                                                     | filtered murine cells | Filtered murine cells (%) | Coverage thresholds | minimum nGenes | %MT | nCells                  | %cells kept | median Cov | median nGenes |
| GR-NB4-p4         | 7375                                                | 216                   | 2.85%                     | [758, 33987]        | 465            | 20% | 1106                    | 15%         | 6330.5     | 2768.5        |
| GR-NB5-p5         | 6396                                                | 62                    | 0.96%                     | [1194, 31200]       | 714            | 20% | 2344                    | 37%         | 2074       | 1232.5        |
| GR-NB7-p5         | 5711                                                | 1062                  | 15.68%                    | [1012, 36064]       | 660            | 20% | 2311                    | 40%         | 2753       | 1674          |
| GR-NB10-p5        | 4221                                                | 138                   | 3.17%                     | [1183, 17057]       | 625            | 20% | 518                     | 12%         | 1949       | 1131.5        |
| HSJD-NB-003       | 4567                                                | 778                   | 14.56%                    | [347, 45359]        | 262            | 20% | 3235                    | 71%         | 12339      | 4205          |
| HSJD-NB-004       | 8385                                                | 303                   | 3.49%                     | [542, 15928]        | 376            | 20% | 7069                    | 84%         | 4996       | 2156          |
| HSJD-NB-005-pn*   | 7170                                                | 287                   | 3.85%                     | [893, 22074]        | 620            | 20% | 6705                    | 94%         | 2909       | 1521          |
| HSJD-NB-005-pn+1* | 7223                                                | 134                   | 1.82%                     | [613, 31880]        | 397            | 20% | 2090                    | 29%         | 2776       | 1478.5        |
| HSJD-NB-009       | 2678                                                | 1                     | 0.04%                     | [484, 58234]        | 258            | 20% | 1761                    | 66%         | 13192      | 4488          |
| HSJD-NB-011       | 7336                                                | 767                   | 9.47%                     | [744, 24092]        | 461            | 20% | 2114                    | 29%         | 7064.5     | 2930.5        |
| IC-pPDX-63-p7*    | 5890                                                | 218                   | 3.57%                     | [406, 49296]        | 321            | 20% | 4267                    | 72%         | 4952       | 2527          |
| IC-pPDX-63-p12*   | 5360                                                | 30                    | 0.56%                     | [284, 4148]         | 222            | 20% | 4265                    | 80%         | 1104       | 728           |
| IC-pPDX-75-p5*    | 8480                                                | 148                   | 1.72%                     | [876, 16969]        | 559            | 20% | 887                     | 10%         | 2411       | 1360          |
| IC-pPDX-75-p8*    | 4614                                                | 92                    | 1.95%                     | [496, 38026]        | 351            | 20% | 3246                    | 70%         | 10470      | 3736          |
| IC-pPDX-109-p2    | 4929                                                | 537                   | 9.82%                     | [560, 39260]        | 391            | 20% | 4590                    | 93%         | 8612       | 3330          |
| IC-pPDX-112-p4    | 6975                                                | 268                   | 3.70%                     | [901, 21545]        | 619            | 20% | 4870                    | 70%         | 1748       | 1134          |
| IC-pPDX-196-p3    | 5882                                                | 100                   | 1.67%                     | [339,29319]         | 242            | 20% | 2745                    | 47%         | 2068       | 1238          |
| IC-pPDX-197-p4    | 13620                                               | 118                   | 0.86%                     | [1005,31892]        | 721            | 20% | 11239                   | 83%         | 4168       | 2184          |

\* For these three models, two biological replicates have been done to assess reproducibility along passages in mice, however, only one of the replicates was included in the integration.
