# Supplementary material for: Reversible transitions between noradrenergic and mesenchymal tumor identities define cell plasticity in neuroblastoma
Source: PubMed Central journal article supplement (PMC10160107; doi:10.1038/s41467-023-38239-5), 2023-05-04
Supplement: 41467_2023_38239_MOESM2_ESM.pdf [file 41467_2023_38239_MOESM2_ESM.pdf]

## **Description of additional supplementary files**

**Supplementary Data 1:** List of genes that are up-regulated in the different clusters of noradrenergic cells in a series of 18 neuroblastoma biopsies.

**Supplementary Data 2:** List of genes that are up-regulated in the different clusters of noradrenergic cells in a series of 15 neuroblastoma PDX models.
